# Supplementary figures and images for: Genomic variants of genes associated with three horticultural traits in apple revealed by genome re-sequencing
Source: PubMed Central journal article supplement — Hortic Res. 2014 Oct 1;1:14045–. doi: 10.1038/hortres.2014.45 (PMC4596325; doi:10.1038/hortres.2014.45), 2014-10-01

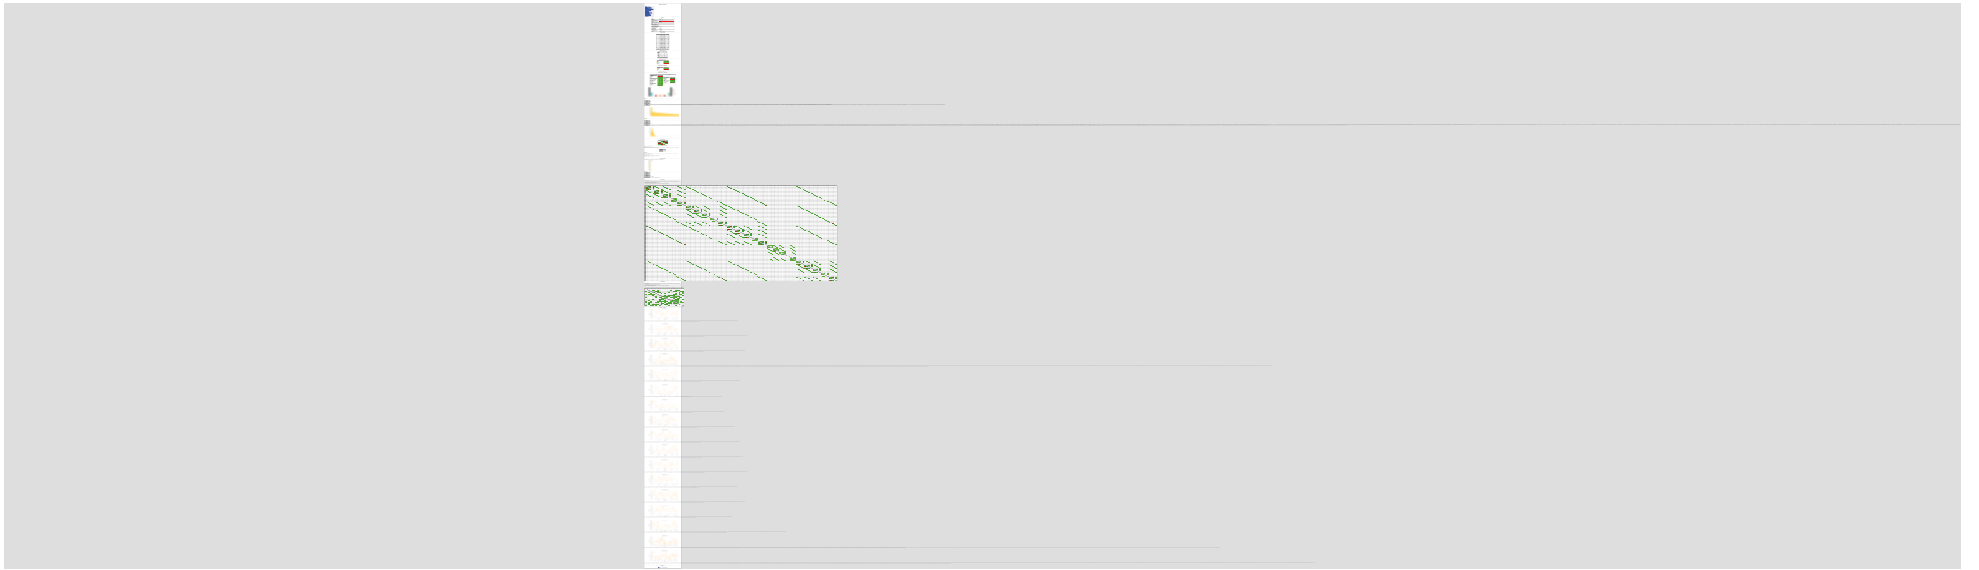

Supplement: hortres201445-s2.pdf [file hortres201445-s2.pdf]

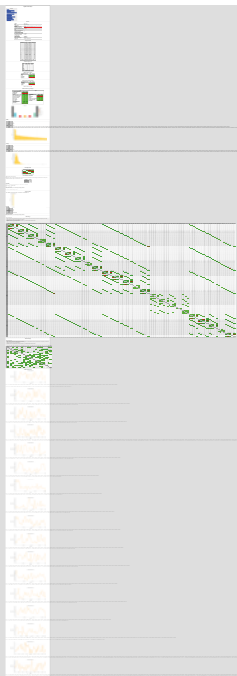

Supplement: hortres201445-s3.pdf [file hortres201445-s3.pdf]
